# Supplementary material for: Oscillating syngas production on NiO/YSZ catalyst from methane oxidation
Source: Royal Society of Chemistry journal article supplement (doi:10.1039/d0ra02051f), 2020-01-01
Supplement: d0ra02051f1.pdf [file d0ra02051f1.pdf]

## Supporting Information

# Oscillating Syngas Production on NiO/YSZ Catalyst in Methane Oxidation

Andrew C. Chien<sup>a,b\*</sup>, Brian Y. Liao<sup>a</sup>

<sup>a</sup> Department of Chemical Engineering, Feng Chia University, Taichung 40724, Taiwan

<sup>b</sup> Green Energy Development Center, Feng Chia University, Taichung 40724, Taiwan

\*Corresponding author: Tel.: +886 424517250 ext 3691. Fax: +886 424510890

Email address: [cynchien@fcu.edu.tw](mailto:cynchien@fcu.edu.tw)

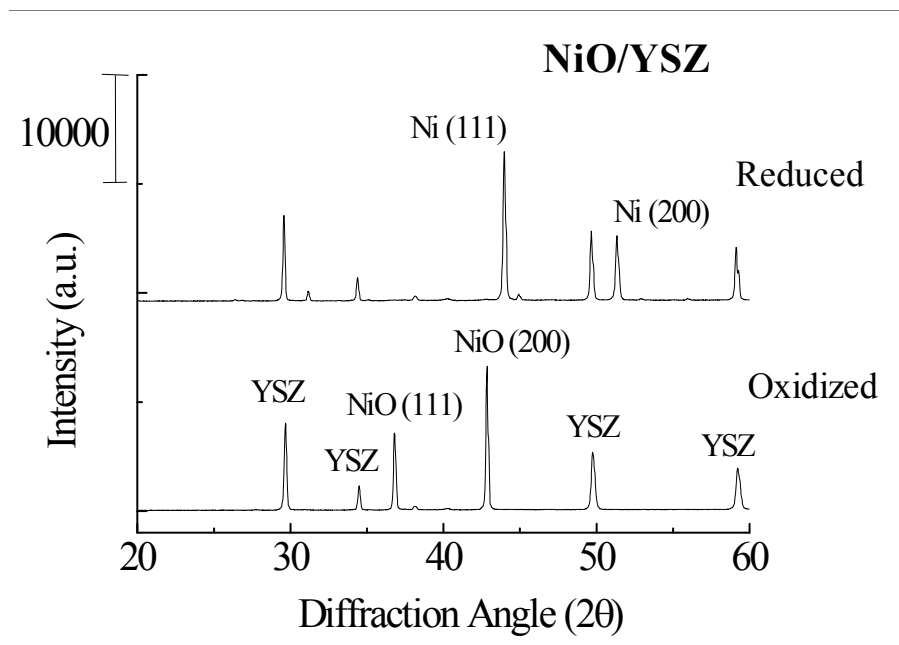

**Figure S1.** X-ray diffraction pattern on NiO/YSZ catalyst

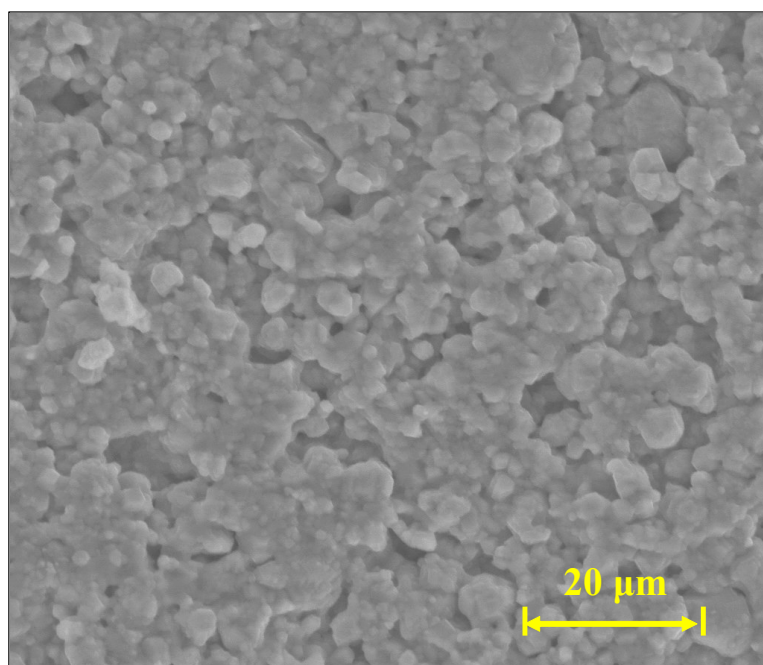

**Figure S2.** SEM image of as-sintered NiO/YSZ catalyst

# NiO/YSZ

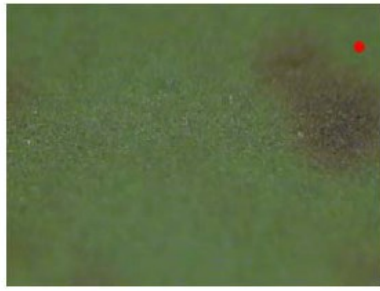

0.3mm

| Analyte | Result    | Error  | Proc-Calc | Line |
|---------|-----------|--------|-----------|------|
| Ni      | 77.4901 % | 0.0660 | Quant.-FP | NiKa |
| Zr      | 10.3679 % | 0.0621 | Quant.-FP | ZrKa |
| Y       | 4.0350 %  | 0.0290 | Quant.-FP | Y Ka |
| Fe      | 0.1069 %  | 0.0028 | Quant.-FP | FeKa |

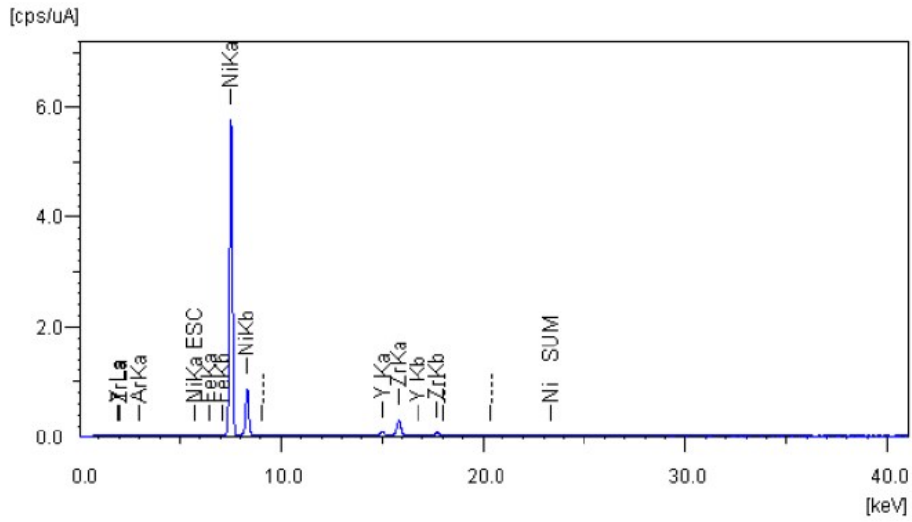

Figure S3. XRF analysis on surface of NiO/YSZ catalyst

## Oscillating Syngas Production

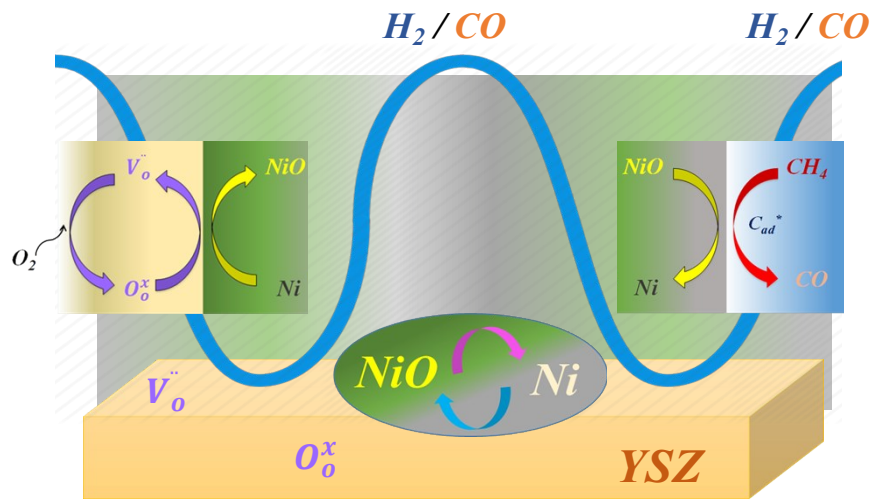

**Figure S4.** Mechanistic cycle of NiO/YSZ catalyst for methane oxidation
